# Supplementary material for: EST79232 and EST79376, Two Novel Sigma-1 Receptor Ligands, Exert Neuroprotection on Models of Motoneuron Degeneration
Source: MDPI journal article supplement (doi:10.3390/ijms23126737), 2022-06-16
Supplement: s1 [file s1]

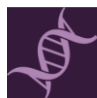

# EST79232 and EST79376, Two Novel Sigma-1 Receptor Ligands, Exert Neuroprotection on Models of Motoneuron Degeneration

Núria Gaja-Capdevila <sup>1,2</sup>, Neus Hernández <sup>1,2</sup>, Sandra Yeste <sup>3</sup>, Raquel F. Reinoso <sup>3</sup>, Javier Burgueño <sup>3</sup>, Ana Montero <sup>3</sup>, Manuel Merlos <sup>3</sup>, José M. Vela <sup>3</sup>, Mireia Herrando-Grabulosa <sup>1,2,\*</sup> and Xavier Navarro <sup>1,2,\*</sup>

SUPPLEMENTARY FIGURE:

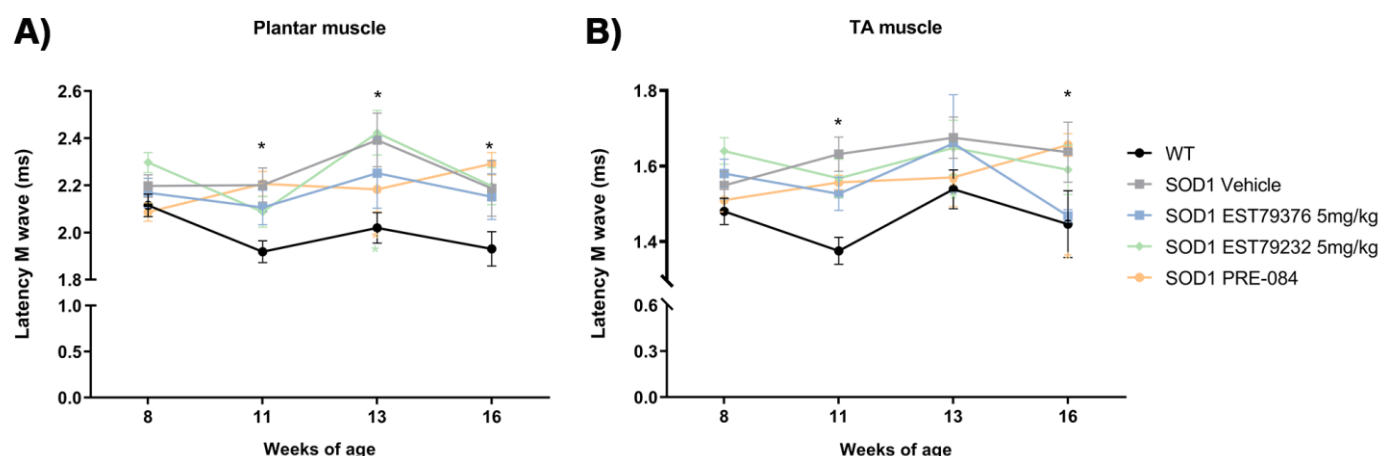

**Figure S1.** Latency results of nerve conduction tests. Plots of the latency to the peak of the CMAP of plantar interosseous (A) and tibialis anterior (TA) (B) muscles in wild type and in treated SOD1<sup>G93A</sup> mice ( $n=9$  SOD1 vehicle,  $n=7$  SOD1 EST79232,  $n=5$  SOD1 EST79376 and  $n=5$  SOD1 PRE-084 mice). Data are mean  $\pm$  SEM, analyzed with two-way ANOVA with Bonferroni's multiple comparisons test. \* $p < 0.05$  versus WT.
